# Supplementary material for: NMR analysis of the human saliva metabolome distinguishes dementia patients from matched controls
Source: Royal Society of Chemistry journal article supplement (doi:10.1039/c6mb00233a), 2016-05-31
Supplement: c6mb00233a1.pdf [file c6mb00233a1.pdf]

## *Supporting Information*

### **NMR analysis of the human saliva metabolome distinguishes dementia patients from matched controls**

*João Figueira<sup>a</sup>, Pär Jonsson<sup>b</sup>, Annelie Nordin Adolfsson<sup>c</sup>, Rolf Adolfsson<sup>c</sup>, Lars Nyberg<sup>d</sup> and  
Anders Öhman<sup>a,\*</sup>*

<sup>a</sup>Department of Pharmacology and Clinical Neuroscience, Umeå University, SE – 901 85 Umeå, <sup>b</sup>Department of Chemistry, Umeå University, SE – 901 87 Umeå, <sup>c</sup>Department of Clinical Sciences, Psychiatry, Umeå University, SE – 901 85 Umeå, <sup>d</sup>Departments of Radiation Sciences and Integrative Medical Biology, Umeå University, SE – 901 87, Umeå, Sweden.

\*Correspondence to: Anders Öhman

E-mail: [anders.ohman01@umu.se](mailto:anders.ohman01@umu.se)

Phone: +46 (0)70 5955136

Fax: +46 (0)90 143107

**Table S-1.** Univariate and multivariate statistical analysis of metabolites in filtrated whole saliva. For each metabolite, the average concentration (PQN normalized) and standard error for the dementia and control groups in SS1+SS3 are listed, as well as the fold-changes and *p*-values from the Mann–Whitney U-test in the pair-wise comparisons. Weight values (*w*<sup>\*</sup>) of the metabolites used in the initial OPLS-DA model of SS1+SS3 are also included. Metabolites with *p*-values below 0.05 and significant weight values *w*<sup>\*</sup> are indicated with an asterisk.

| Metabolite             | Dementia           | Control            | Dementia versus Controls |                                  |                       |
|------------------------|--------------------|--------------------|--------------------------|----------------------------------|-----------------------|
|                        | Mean ± SEM<br>[mM] | Mean ± SEM<br>[mM] | fold<br>change           | Mann–Whitney<br>U-test, <i>p</i> | <i>w</i> <sup>*</sup> |
| 2-Amino adipate        | 0.5083 ± 0.0311    | 0.5089 ± 0.0187    | 0.99                     | 0.290                            |                       |
| 2-Hydroxyisobutyrate   | 0.0152 ± 0.0020    | 0.0197 ± 0.0032    | 0.77                     | 0.390                            |                       |
| 2-Hydroxyisovalerate   | 0.0191 ± 0.0031    | 0.0208 ± 0.0028    | 0.92                     | 0.412                            |                       |
| 2-Oxoglutarate         | 0.0845 ± 0.0033    | 0.0831 ± 0.0023    | 1.02                     | 0.440                            |                       |
| 4-Hydroxyphenylacetate | 0.0558 ± 0.0062    | 0.0520 ± 0.0051    | 1.07                     | 0.213                            | −0.04                 |
| Acetate                | 9.4878 ± 0.4117    | 7.6043 ± 0.2546    | 1.25                     | 2e−05*                           | 0.44 *                |
| Acetoacetate           | 0.0408 ± 0.0017    | 0.0452 ± 0.0066    | 0.90                     | 0.216                            | 0.05                  |
| Acetone                | 0.0456 ± 0.0051    | 0.0622 ± 0.0084    | 0.73                     | 0.379                            | 0.04                  |
| Adenine                | 0.0312 ± 0.0030    | 0.0311 ± 0.0029    | 1.00                     | 0.207                            |                       |
| Alanine                | 0.2174 ± 0.0125    | 0.1933 ± 0.0076    | 1.12                     | 0.071                            | −0.12                 |
| Anserine               | 0.0237 ± 0.0033    | 0.0222 ± 0.0012    | 1.07                     | 0.076                            | −0.03                 |
| Aspartate              | 0.0847 ± 0.0039    | 0.0816 ± 0.0026    | 1.04                     | 0.158                            |                       |
| Butyrate               | 0.1943 ± 0.0137    | 0.1775 ± 0.0105    | 1.09                     | 0.040*                           | −0.13                 |
| Caffeine               | 0.0306 ± 0.0026    | 0.0285 ± 0.0015    | 1.07                     | 0.207                            | −0.02                 |
| Choline                | 0.0513 ± 0.0030    | 0.0615 ± 0.0033    | 0.83                     | 0.080                            | 0.16                  |
| Creatine               | 0.0780 ± 0.0039    | 0.0842 ± 0.0025    | 0.93                     | 0.058                            | 0.08                  |
| Dimethyl sulfone       | 0.0383 ± 0.0032    | 0.0471 ± 0.0021    | 0.81                     | 0.005*                           | 0.33 *                |
| Dimethylamine          | 0.0105 ± 0.0005    | 0.011 ± 0.0004     | 0.96                     | 0.344                            | 0.09                  |
| Ethanol                | 0.1249 ± 0.0120    | 0.1145 ± 0.0085    | 1.09                     | 0.078                            | −0.06                 |
| Formate                | 0.7512 ± 0.1173    | 0.7517 ± 0.0780    | 1.00                     | 0.435                            | 0.01                  |
| Fucose                 | 0.0930 ± 0.0120    | 0.0758 ± 0.0067    | 1.23                     | 0.125                            | −0.11                 |
| Glucitol               | 0.1672 ± 0.0287    | 0.6228 ± 0.1726    | 0.27                     | 0.204                            |                       |
| Glucose                | 0.1825 ± 0.0361    | 0.5719 ± 0.1649    | 0.32                     | 0.255                            | 0.13                  |
| Glycerol               | 0.7225 ± 0.0866    | 0.9179 ± 0.0708    | 0.79                     | 0.040*                           | 0.20 *                |
| Glycine                | 0.4214 ± 0.0344    | 0.4541 ± 0.0428    | 0.93                     | 0.499                            | 0.04                  |
| Histamine              | 0.0484 ± 0.0041    | 0.0386 ± 0.0019    | 1.26                     | 0.019*                           | 0.30 *                |
| Isoleucine             | 0.0690 ± 0.0061    | 0.0558 ± 0.0026    | 1.24                     | 0.021*                           | −0.22                 |
| Lactate                | 1.1788 ± 0.3198    | 2.6417 ± 0.5047    | 0.45                     | 0.093                            | 0.17                  |
| Leucine                | 0.1174 ± 0.0111    | 0.0917 ± 0.0044    | 1.28                     | 0.055                            | −0.24                 |
| Methanol               | 0.0654 ± 0.0072    | 0.0562 ± 0.0048    | 1.16                     | 0.011*                           | −0.04                 |
| Methylamine            | 0.0166 ± 0.0016    | 0.0169 ± 0.0008    | 0.98                     | 0.171                            | −0.02                 |
| O-Phosphocholine       | 0.0095 ± 0.0010    | 0.0189 ± 0.0034    | 0.50                     | 0.063                            | 0.16                  |
| Ornithine              | 0.1650 ± 0.0116    | 0.1425 ± 0.0052    | 1.16                     | 0.029*                           | −0.10                 |
| Phenylacetate          | 0.0450 ± 0.0045    | 0.0398 ± 0.0024    | 1.13                     | 0.152                            | 0.01                  |
| Proline                | 0.3114 ± 0.0257    | 0.3187 ± 0.0181    | 0.98                     | 0.492                            | 0.07                  |
| Propionate             | 1.9501 ± 0.1593    | 1.4443 ± 0.0720    | 1.35                     | 0.002*                           | 0.34 *                |
| Putrescine             | 0.1463 ± 0.0131    | 0.1206 ± 0.0062    | 1.21                     | 0.048*                           | −0.19                 |
| Pyruvate               | 0.0860 ± 0.0089    | 0.0872 ± 0.0071    | 0.99                     | 0.330                            | 0.08                  |
| Sarcosine              | 0.0144 ± 0.0010    | 0.0148 ± 0.0007    | 0.97                     | 0.230                            | −0.02                 |
| Succinate              | 0.0986 ± 0.0148    | 0.1584 ± 0.0170    | 0.62                     | 0.008*                           | 0.18 *                |
| Taurine                | 0.1860 ± 0.0083    | 0.2647 ± 0.0189    | 0.70                     | 0.007*                           | 0.20 *                |
| Trimethylamine         | 0.0071 ± 0.0018    | 0.0069 ± 0.0006    | 1.03                     | 0.119                            | −0.05                 |
| Valine                 | 0.0805 ± 0.0072    | 0.0712 ± 0.0038    | 1.13                     | 0.340                            | −0.18                 |
| Xanthine               | 0.0524 ± 0.0070    | 0.0477 ± 0.0028    | 1.10                     | 0.131                            | −0.04                 |

**Table S-2.** Univariate and multivariate statistical analysis of metabolites in filtrated whole saliva. For each metabolite, the average concentration (PQN normalized) and standard error for the pre-dementia and control groups in SS2 are listed, as well as the fold-changes and *p*-values from the Mann–Whitney U-test in the pair-wise comparisons. Weight values (*w*\*) from the OPLS-DA model generated with seven metabolites are also included. Metabolites with *p*-values below 0.05 are indicated with an asterisk.

| Metabolite             | Pre-dementia       | Control            | Pre-dementia versus Controls |                                  |            |
|------------------------|--------------------|--------------------|------------------------------|----------------------------------|------------|
|                        | Mean ± SEM<br>[mM] | Mean ± SEM<br>[mM] | fold<br>change               | Mann–Whitney<br>U-test, <i>p</i> | <i>w</i> * |
| 2-Amino adipate        | 0.6450 ± 0.0310    | 0.6465 ± 0.0208    | 1.00                         | 0.447                            |            |
| 2-Hydroxyisobutyrate   | 0.0090 ± 0.0005    | 0.0107 ± 0.0008    | 0.84                         | 0.284                            |            |
| 2-Hydroxyisovalerate   | 0.0223 ± 0.0059    | 0.0202 ± 0.0022    | 1.10                         | 0.140                            |            |
| 2-Oxoglutarate         | 0.0765 ± 0.0035    | 0.0807 ± 0.0033    | 0.95                         | 0.401                            |            |
| 4-Hydroxyphenylacetate | 0.0387 ± 0.0024    | 0.0427 ± 0.0038    | 0.91                         | 0.240                            |            |
| Acetate                | 8.6509 ± 0.2810    | 8.5282 ± 0.2024    | 1.01                         | 0.302                            | −0.17      |
| Acetoacetate           | 0.0415 ± 0.0016    | 0.0401 ± 0.0014    | 1.04                         | 0.498                            |            |
| Acetone                | 0.0422 ± 0.0047    | 0.0297 ± 0.0019    | 1.42                         | 0.057                            |            |
| Adenine                | 0.0468 ± 0.0057    | 0.0488 ± 0.0024    | 0.96                         | 0.142                            |            |
| Alanine                | 0.2300 ± 0.0130    | 0.2158 ± 0.0076    | 1.06                         | 0.307                            |            |
| Anserine               | 0.0252 ± 0.0012    | 0.0284 ± 0.0011    | 0.88                         | 0.054                            |            |
| Aspartate              | 0.1023 ± 0.0052    | 0.0958 ± 0.0026    | 1.07                         | 0.300                            |            |
| Butyrate               | 0.1875 ± 0.0123    | 0.1812 ± 0.0071    | 1.04                         | 0.456                            |            |
| Caffeine               | 0.0202 ± 0.0011    | 0.0208 ± 0.0010    | 0.97                         | 0.452                            |            |
| Choline                | 0.0582 ± 0.0030    | 0.0555 ± 0.0025    | 1.05                         | 0.031*                           |            |
| Creatine               | 0.0606 ± 0.0024    | 0.0631 ± 0.0024    | 0.96                         | 0.414                            |            |
| Dimethyl sulfone       | 0.0416 ± 0.0028    | 0.0394 ± 0.0016    | 1.06                         | 0.286                            | −0.07      |
| Dimethylamine          | 0.0094 ± 0.0007    | 0.0087 ± 0.0003    | 1.08                         | 0.388                            |            |
| Ethanol                | 0.1195 ± 0.0455    | 0.0850 ± 0.0042    | 1.40                         | 0.435                            |            |
| Formate                | 0.7492 ± 0.0779    | 0.8060 ± 0.0699    | 0.92                         | 0.119                            |            |
| Fucose                 | 0.1040 ± 0.0069    | 0.1140 ± 0.0038    | 0.91                         | 0.002*                           |            |
| Glucitol               | 0.7236 ± 0.5035    | 0.5273 ± 0.2349    | 1.37                         | 0.115                            |            |
| Glucose                | 0.4500 ± 0.0554    | 0.6165 ± 0.1033    | 0.73                         | 0.306                            |            |
| Glycerol               | 0.8813 ± 0.0690    | 0.9501 ± 0.0647    | 0.93                         | 0.317                            | 0.27       |
| Glycine                | 0.4437 ± 0.0259    | 0.4770 ± 0.0210    | 0.93                         | 0.336                            |            |
| Histamine              | 0.0353 ± 0.0019    | 0.0352 ± 0.0016    | 1.00                         | 0.248                            | 0.02       |
| Isoleucine             | 0.0630 ± 0.0050    | 0.0635 ± 0.0027    | 0.99                         | 0.259                            |            |
| Lactate                | 1.2829 ± 0.2337    | 1.4043 ± 0.2234    | 0.91                         | 0.002*                           |            |
| Leucine                | 0.0991 ± 0.0066    | 0.1089 ± 0.0042    | 0.91                         | 0.195                            |            |
| Methanol               | 0.0439 ± 0.0028    | 0.0460 ± 0.0025    | 0.95                         | 0.369                            |            |
| Methylamine            | 0.0180 ± 0.0010    | 0.0178 ± 0.0008    | 1.01                         | 0.497                            |            |
| O-Phosphocholine       | 0.0112 ± 0.0012    | 0.0099 ± 0.0007    | 1.13                         | 0.197                            |            |
| Ornithine              | 0.1140 ± 0.0064    | 0.1243 ± 0.0044    | 0.92                         | 0.039*                           |            |
| Phenylacetate          | 0.0460 ± 0.0037    | 0.0453 ± 0.0019    | 1.02                         | 0.498                            |            |
| Proline                | 0.3587 ± 0.0247    | 0.3803 ± 0.0220    | 0.94                         | 0.226                            |            |
| Propionate             | 1.7380 ± 0.0908    | 1.5998 ± 0.0641    | 1.09                         | 0.041*                           | −0.76      |
| Putrescine             | 0.1316 ± 0.0093    | 0.1304 ± 0.0047    | 1.01                         | 0.347                            |            |
| Pyruvate               | 0.0583 ± 0.0055    | 0.0581 ± 0.0023    | 1.00                         | 0.323                            |            |
| Sarcosine              | 0.0145 ± 0.0007    | 0.0141 ± 0.0004    | 1.03                         | 0.352                            |            |
| Succinate              | 0.1466 ± 0.0151    | 0.1327 ± 0.0116    | 1.10                         | 0.012*                           | −0.55      |
| Taurine                | 0.2020 ± 0.0096    | 0.2024 ± 0.0087    | 1.00                         | 0.275                            | −0.11      |
| Trimethylamine         | 0.0084 ± 0.0009    | 0.0087 ± 0.0006    | 0.97                         | 0.284                            |            |
| Valine                 | 0.0649 ± 0.0066    | 0.0709 ± 0.0034    | 0.92                         | 0.098                            |            |
| Xanthine               | 0.0592 ± 0.0037    | 0.0680 ± 0.0036    | 0.87                         | 0.212                            |            |
